# Supplementary material for: In Silico Identification and In Vitro Evaluation of Natural Inhibitors of Leishmania major Pteridine Reductase I
Source: PubMed Central journal article supplement (PMC6149668; doi:10.3390/molecules22122166), 2017-12-06
Supplement: molecules-22-02166-s001.pdf [file molecules-22-02166-s001.pdf]

1 Supplementary Materials

2 **In Silico Identification and In Vitro Evaluation of**  
3 **Natural Inhibitors of *Leishmania major* Pteridine**  
4 **Reductase I**

5 **Fabian C. Herrmann**<sup>1</sup>, **Nirina Sivakumar**<sup>1</sup>, **Joachim Jose**<sup>2</sup>, **Maria P. Costi**<sup>3</sup>, **Cecilia Pozzi**<sup>4</sup> and  
6 **Thomas J. Schmidt**<sup>1,\*</sup>

7 <sup>1</sup> Institute of Pharmaceutical Biology and Phytochemistry (IPBP), University of Muenster, PharmaCampus,  
8 *Corrensstrasse 48, D-48149 Muenster, Germany; f\_herr01@uni-muenster.de (F.C.H.); nirinasiva@gmail.com*  
9 *(N.S.)*

10 <sup>2</sup> Institute of Pharmaceutical and Medicinal Chemistry, University of Muenster, PharmaCampus,  
11 *Correnstrasse 48, D-48149 Muenster, Germany; joachim.jose@uni-muenster.de*

12 <sup>3</sup> Department of Life Sciences, University of Modena and Reggio Emilia, Via G. Campi 103, 41125 Modena,  
13 *Italy; mariapaola.costi@unimore.it*

14 <sup>4</sup> Department of Biotechnology, Chemistry and Pharmacy, University of Siena, Via A. Moro 2, 53100 Siena,  
15 *Italy; pozzi4@unisi.it*

16 \* Correspondence: thomschm@uni-muenster.de; Tel.: +49-251-83-33378

17

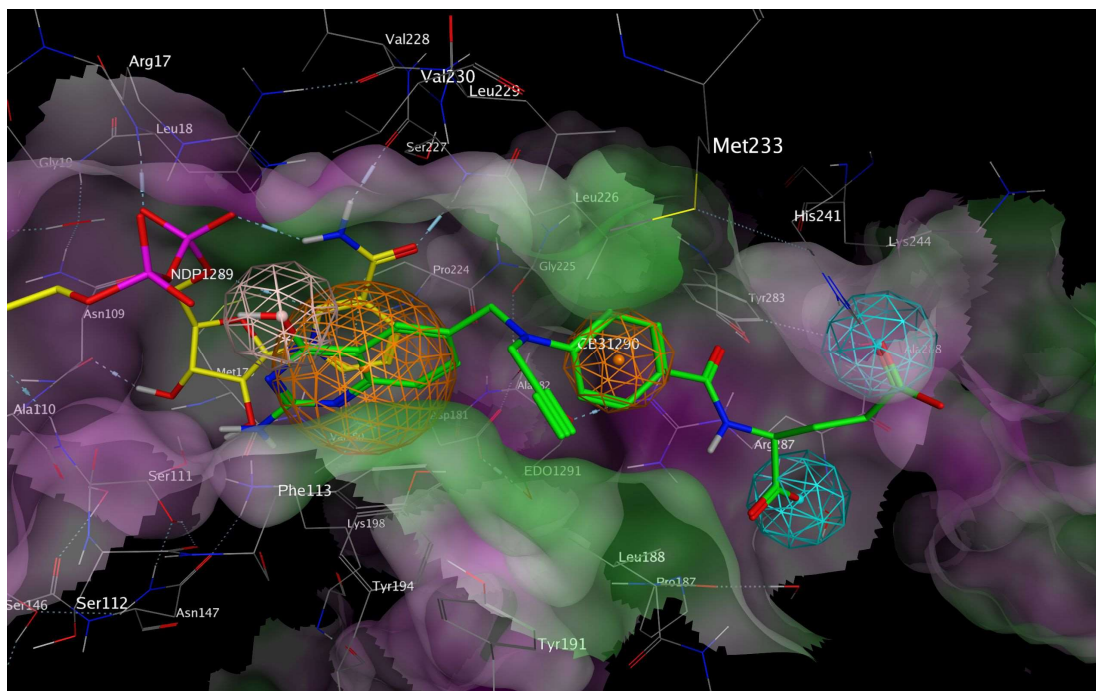

18

19

20

21

22

**Figure S1.** Pharmacophore query for *Leishmania major* pteridine reductase I (PTR1) with Protein Data Bank ID (PDB-ID) “2BFA”, based on the co-crystallized inhibitor CB3. Aromatic features are displayed as orange, combined donor and acceptor features are beige-colored, H-bond acceptor features are in cyan, and exclusion spheres are not shown.

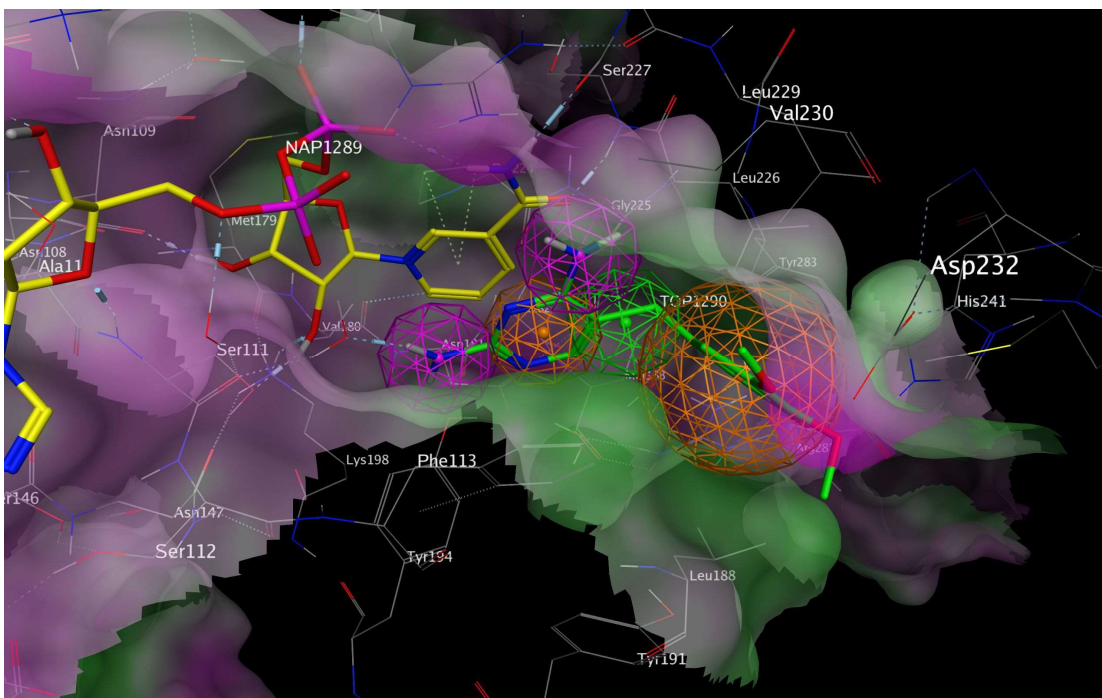

23

24

25

26

**Figure S2.** Pharmacophore query for *L. major* PTR1 (PDB-ID “2BFM”) based on the co-crystallized inhibitor Trimethoprim. Aromatic features are displayed as orange, H-bond donor features are purple, lipophilic features are green, and the exclusion spheres are not shown.

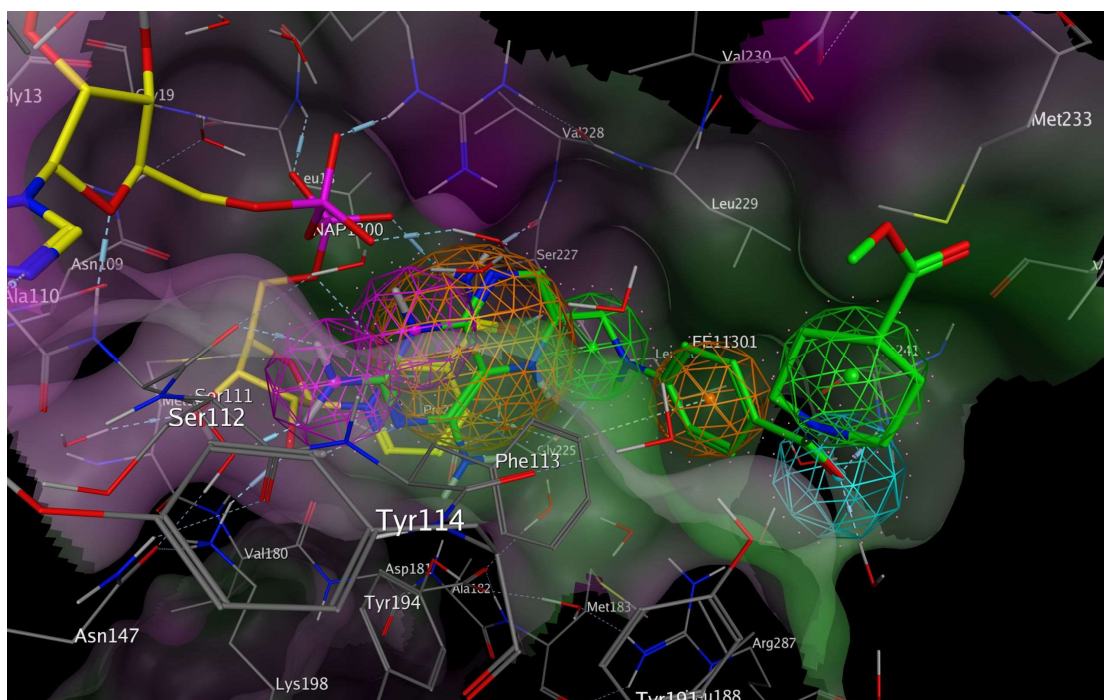

27

28

29

30

**Figure S3.** Pharmacophore query for *L. major* PTR1 (PDB-ID "2QHX") based on the co-crystallized inhibitor FE1. Aromatic features are displayed as orange, H-bond donor features are purple, lipophilic features are green, and the exclusion spheres are not shown.

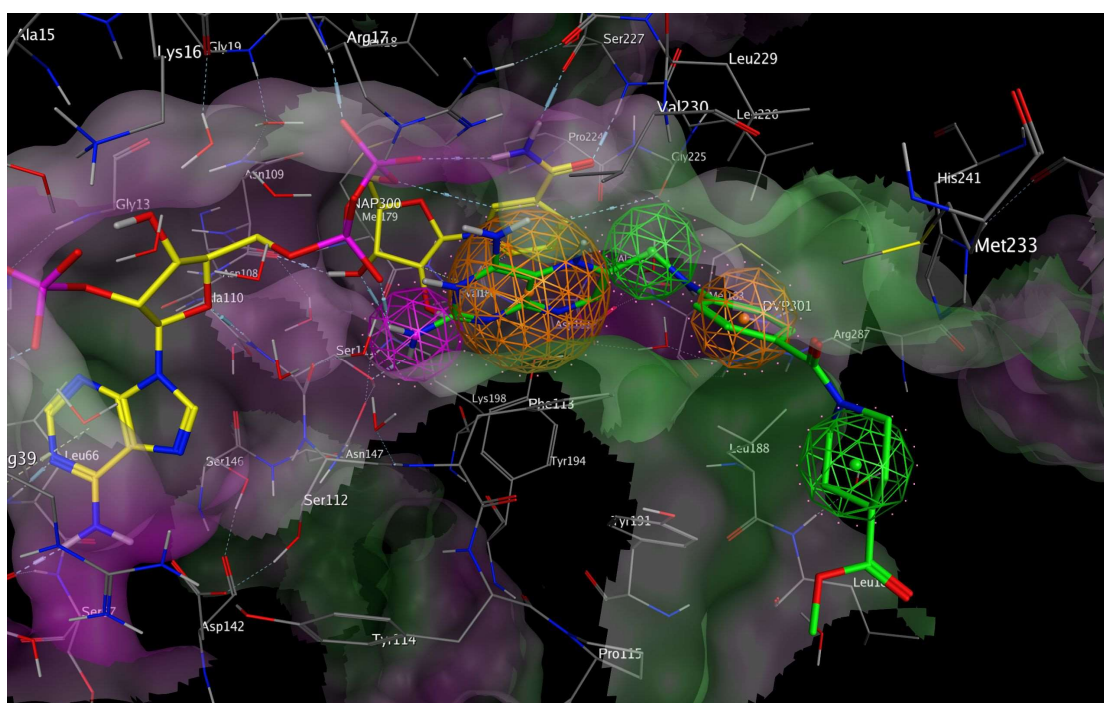

31

32

33

34

**Figure S4.** Pharmacophore query for *L. major* PTR1 (PDB-ID "3H4V") based on the co-crystallized inhibitor DVP; aromatic features in orange, H-bond donor features in purple, lipophilic features in green, exclusion spheres not shown.

35

36

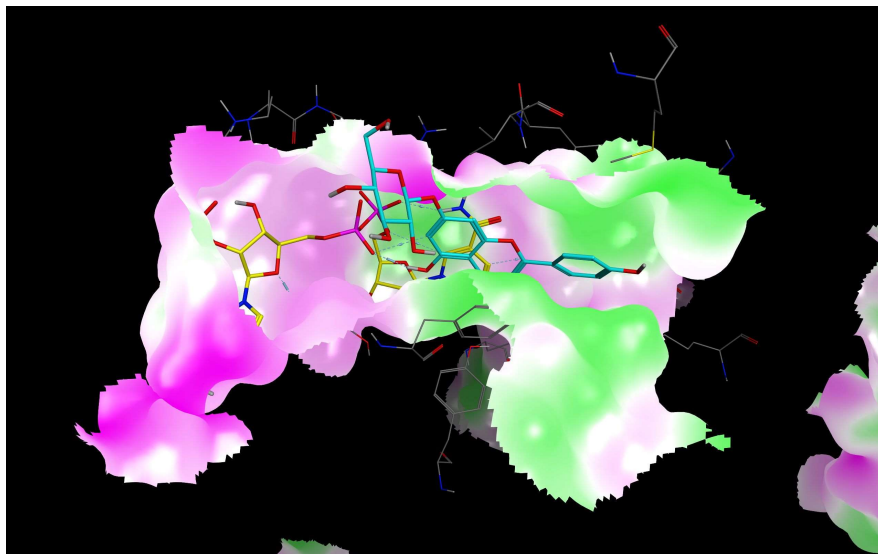

37

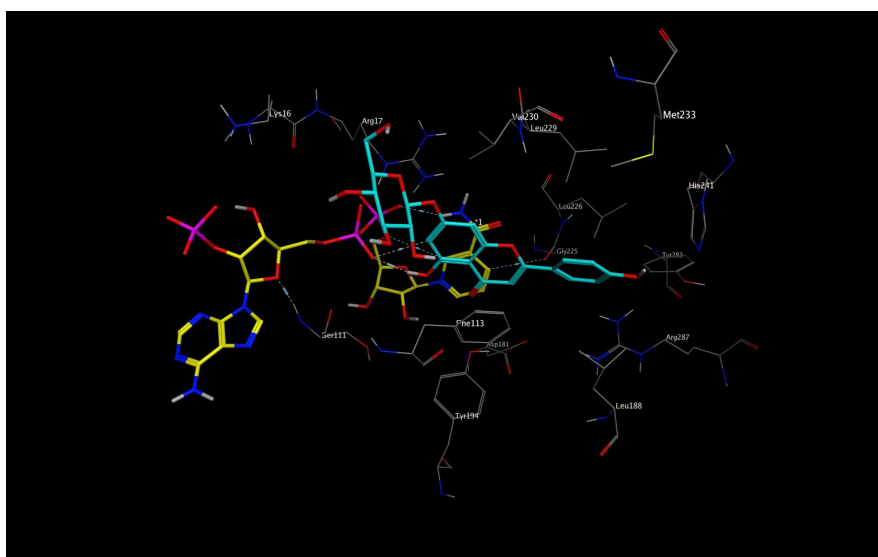

38 **Figure S5.** Best calculated docking pose of apigenin-7-glucoside (**2**) in the folic acid binding site of  
39 *LmPTR1* (PDB-ID “3H4V”), where co-crystallized nicotinamide adenine dinucleotide (NADP<sup>+</sup>) are  
40 shown in yellow, and the best docking pose of **2** is shown in cyan. Top: The molecular surface of the  
41 binding site is colored according to lipophilicity, with green indicating high lipophilicity, and purple  
42 indicate low lipophilicity. Bottom: Surface not shown, but amino acid residues labeled.

43



44

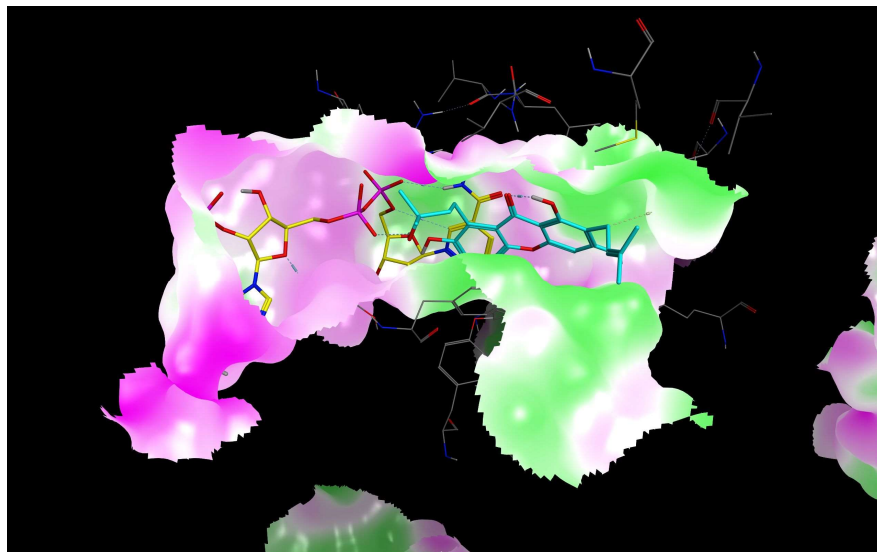

45

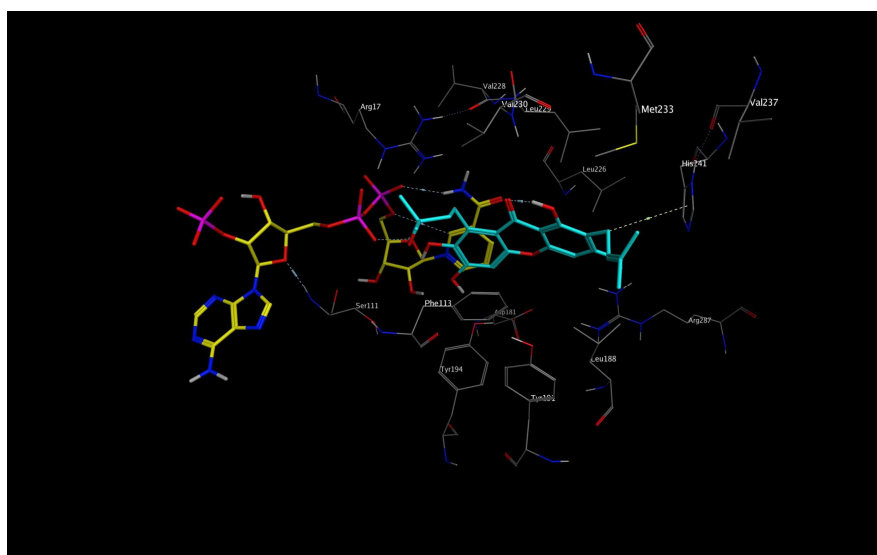

46 **Figure S6.** Best calculated docking pose of garcinone C (**3**) in the folic acid binding site of *LmPTR1*  
47 (PDB-ID “3H4V”), where co-crystallized NADP<sup>+</sup> are shown in yellow, and the best docking pose of **3**  
48 is shown in cyan. Top: The molecular surface of the binding site is colored according to lipophilicity,  
49 with green indicating high lipophilicity, and purple indicating low lipophilicity. Bottom: Surface not  
50 shown, but amino acid residues labeled.

51

52

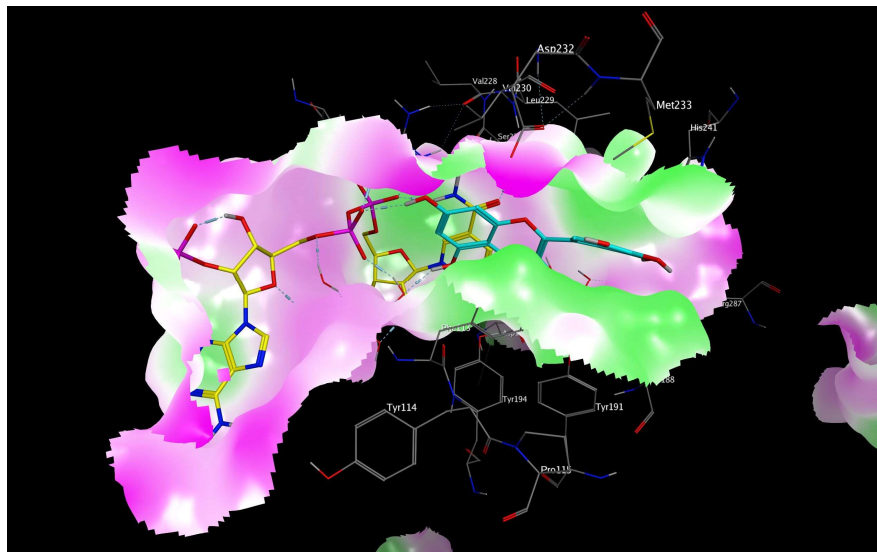

53

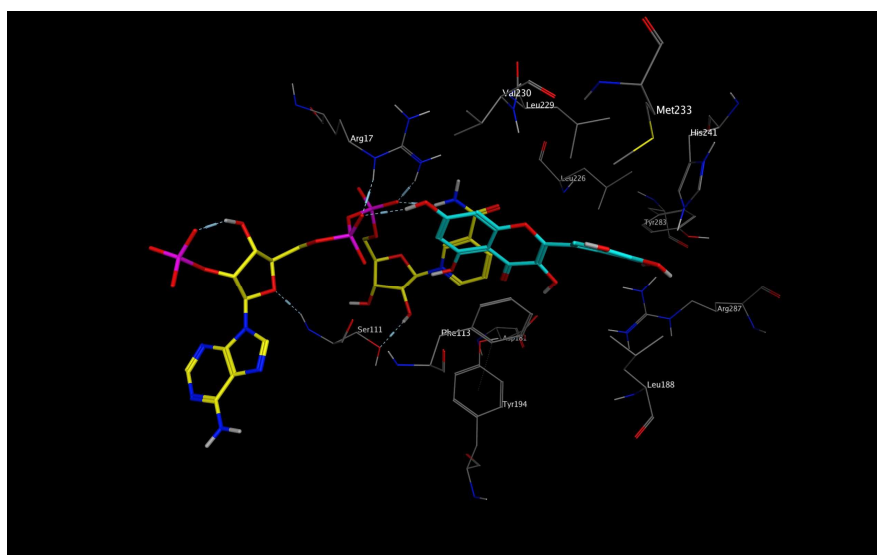

54 **Figure S7.** Best calculated docking pose of myricetin (**4**) in the folic acid binding site of *LmPTR1*  
55 (PDB-ID "2BFM"), with co-crystallized NADP<sup>+</sup> shown in yellow, and the best docking pose of **4**  
56 shown in cyan. Top: The molecular surface of the binding site is colored according to lipophilicity,  
57 with green indicating high lipophilicity, and purple indicating low lipophilicity. Bottom: Surface not  
58 shown, but amino acid residues labeled.

59

60

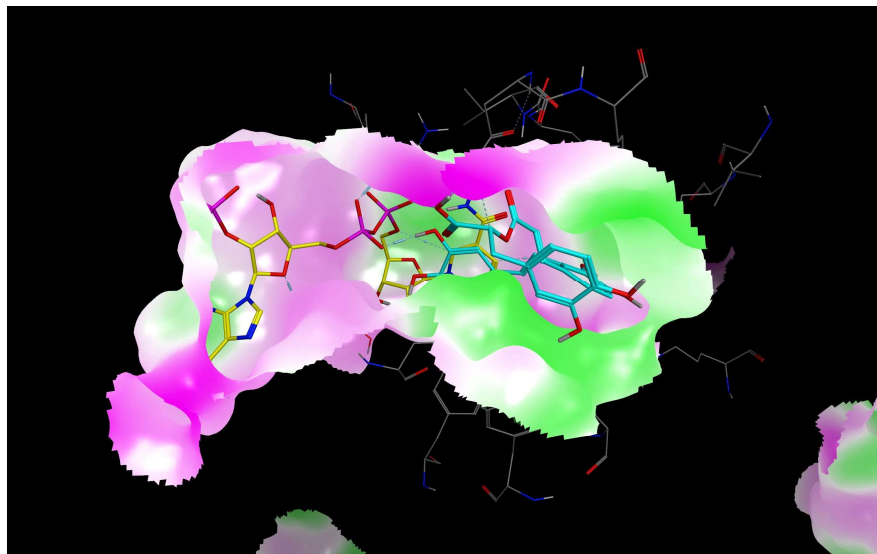

61

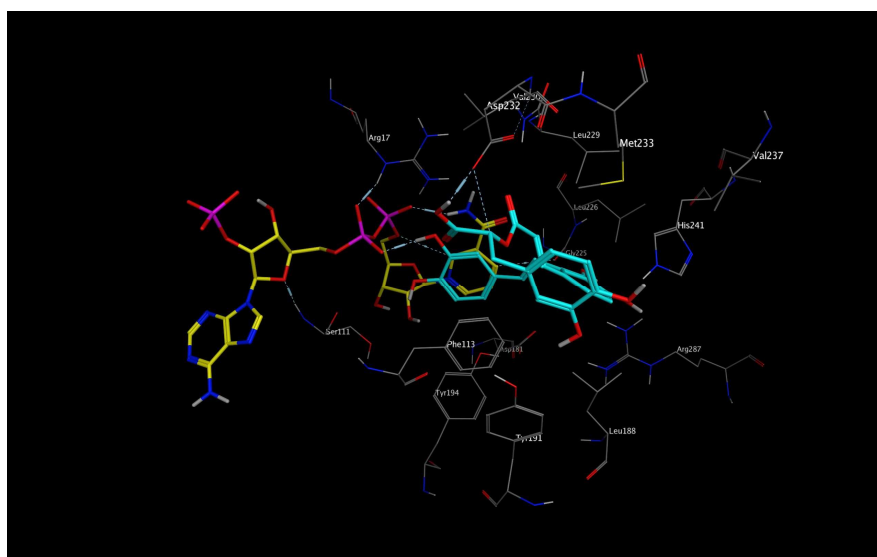

62

63

64

65

66

**Figure S8.** Best calculated docking pose of salvanolic acid A (5) in the folic acid binding site of *LmPTR1* (PDB-ID "2QHx"), with co-crystallized NADP<sup>+</sup> shown in yellow, and the best docking pose of 5 shown in cyan. Top: The molecular surface of the binding site colored according to lipophilicity, with green indicating high lipophilicity, and purple indicating low lipophilicity. Bottom: Surface not shown, but amino acid residues labeled.

67

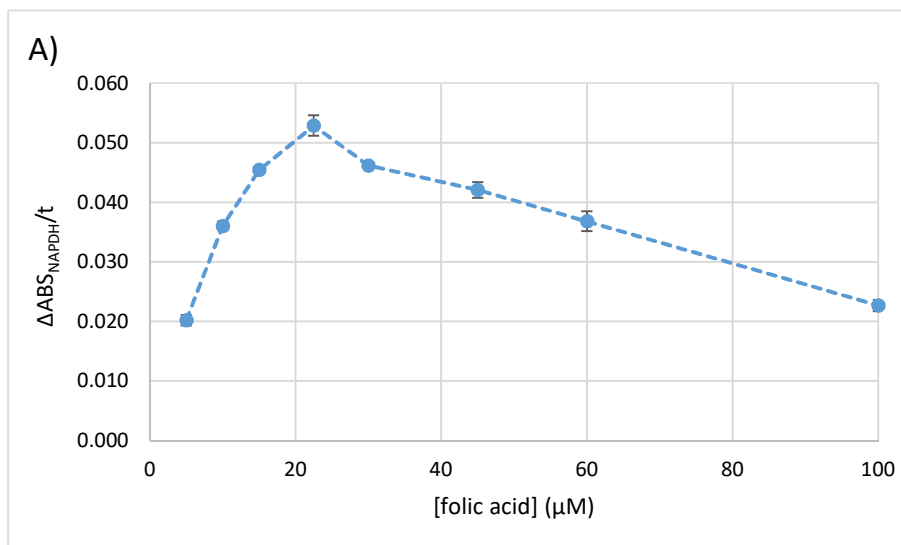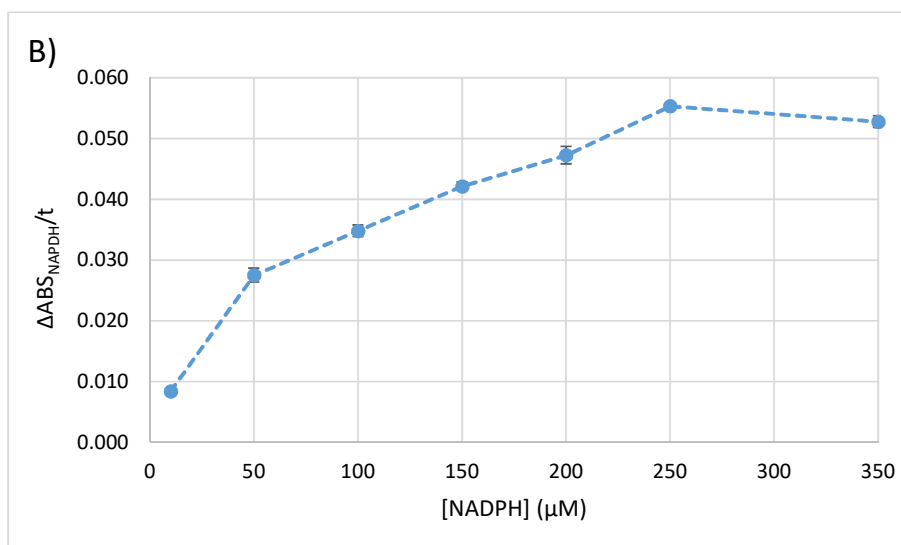

70 **Figure S9.** Experimental determination of *LmPTR1*'s saturating conditions of folic acid and NADPH.  
71 The extent of enzymatic conversion was monitored by following the decrease of absorbance at 340  
72 nm as a linear kinetic parameter. **(A)** Co-substrate NADPH in excess (250  $\mu\text{M}$ ) while varying  
73 concentrations of folic acid from 5 to 100  $\mu\text{M}$  were used. The phenomenon of substrate inhibition can  
74 be clearly noticed. **(B)** Substrate folic acid at saturating conditions (22.5  $\mu\text{M}$ ) while varying  
75 concentrations of NADPH from 5 to 350  $\mu\text{M}$  were used.



|                          |                  |
|--------------------------|------------------|
| Best-fit values          |                  |
| BOTTOM                   | 19.75            |
| TOP                      | 56.97            |
| LOGEC50                  | 0.8624           |
| HILLSLOPE                | 2.547            |
| EC50                     | 7.284            |
| Std. Error               |                  |
| BOTTOM                   | 2.062            |
| TOP                      | 1.659            |
| LOGEC50                  | 0.05456          |
| HILLSLOPE                | 0.7778           |
| 95% Confidence Intervals |                  |
| BOTTOM                   | 15.45 to 24.05   |
| TOP                      | 53.51 to 60.43   |
| LOGEC50                  | 0.7485 to 0.9762 |
| HILLSLOPE                | 0.9246 to 4.170  |
| EC50                     | 5.605 to 9.466   |
| Goodness of Fit          |                  |
| Degrees of Freedom       | 20               |
| R <sup>2</sup>           | 0.9216           |
| Absolute Sum of Squares  | 504.9            |
| Sy.x                     | 5.024            |

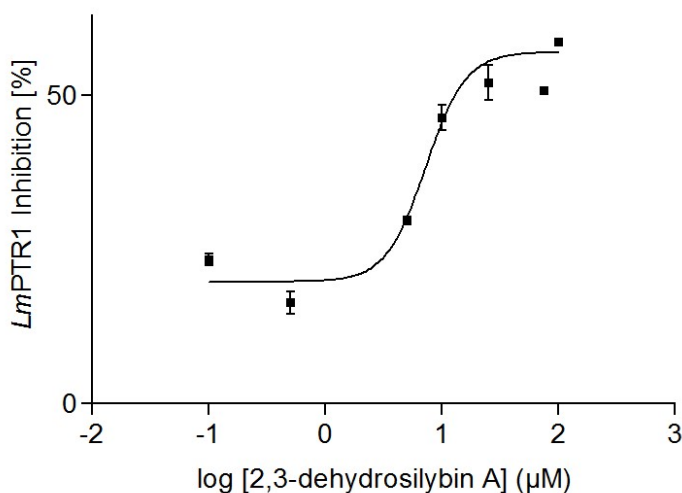

76

77 **Figure S10.** EC<sub>50</sub> determination of 2,3-dehydrosilybin A (**1**). An IC<sub>50</sub> determination could not be  
 78 carried out due to the limited solubility of **1** in the employed assay system. The absolute EC<sub>50</sub> value  
 79 was determined by nonlinear regression analysis employing GraphPad Prism 3.00, and is given in  
 80 Table 1.

|                          |                |
|--------------------------|----------------|
| Best-fit values          |                |
| BOTTOM (Constant)        | 0.0            |
| TOP (Constant)           | 100.0          |
| LOGEC50                  | 1.638          |
| HILLSLOPE                | 1.967          |
| EC50                     | 43.46          |
| Std. Error               |                |
| LOGEC50                  | 0.02169        |
| HILLSLOPE                | 0.2154         |
| 95% Confidence Intervals |                |
| LOGEC50                  | 1.593 to 1.683 |
| HILLSLOPE                | 1.517 to 2.418 |
| EC50                     | 39.14 to 48.24 |
| Goodness of Fit          |                |
| Degrees of Freedom       | 19             |
| R <sup>2</sup>           | 0.9669         |
| Absolute Sum of Squares  | 788.9          |
| Sy.x                     | 6.444          |

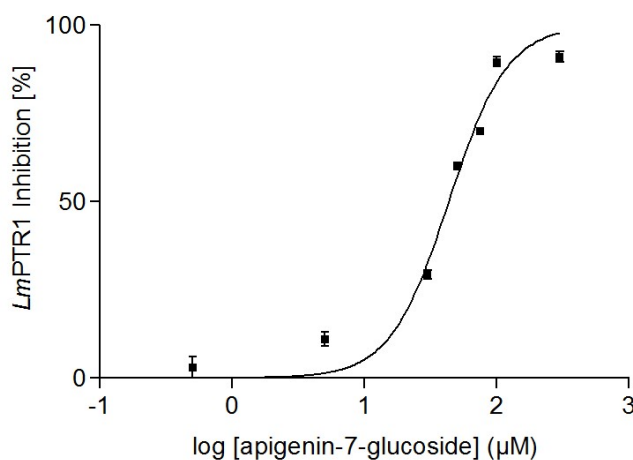

81

82 **Figure S11.** IC<sub>50</sub> determination of apigenin-7-glucoside (**2**). The absolute IC<sub>50</sub> value was determined  
 83 by nonlinear regression analysis employing GraphPad Prism 3.00, and is given in Table 1.

|                          |                 |
|--------------------------|-----------------|
| Best-fit values          |                 |
| BOTTOM (Constant)        | 0.0             |
| TOP (Constant)           | 100.0           |
| LOGEC50                  | 1.420           |
| HILLSLOPE                | 1.284           |
| EC50                     | 26.29           |
| Std. Error               |                 |
| LOGEC50                  | 0.04645         |
| HILLSLOPE                | 0.1770          |
| 95% Confidence Intervals |                 |
| LOGEC50                  | 1.321 to 1.518  |
| HILLSLOPE                | 0.9083 to 1.659 |
| EC50                     | 20.95 to 32.98  |
| Goodness of Fit          |                 |
| Degrees of Freedom       | 16              |
| R <sup>2</sup>           | 0.9174          |
| Absolute Sum of Squares  | 1459            |
| Sy.x                     | 9.550           |

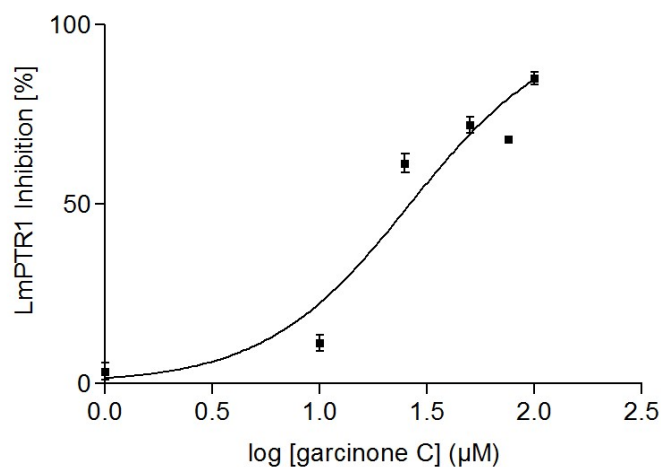

84

85 **Figure S12.** IC<sub>50</sub> determination of garcinone C (3). The absolute IC<sub>50</sub> value was determined by  
 86 nonlinear regression analysis employing GraphPad Prism 3.00, and is given in Table 1.

|                          |                |
|--------------------------|----------------|
| Best-fit values          |                |
| BOTTOM (Constant)        | 0.0            |
| TOP (Constant)           | 100.0          |
| LOGEC50                  | 1.322          |
| HILLSLOPE                | 1.312          |
| EC50                     | 21.01          |
| Std. Error               |                |
| LOGEC50                  | 0.02807        |
| HILLSLOPE                | 0.1163         |
| 95% Confidence Intervals |                |
| LOGEC50                  | 1.262 to 1.383 |
| HILLSLOPE                | 1.061 to 1.563 |
| EC50                     | 18.27 to 24.15 |
| Goodness of Fit          |                |
| Degrees of Freedom       | 13             |
| R <sup>2</sup>           | 0.9716         |
| Absolute Sum of Squares  | 382.3          |
| Sy.x                     | 5.423          |

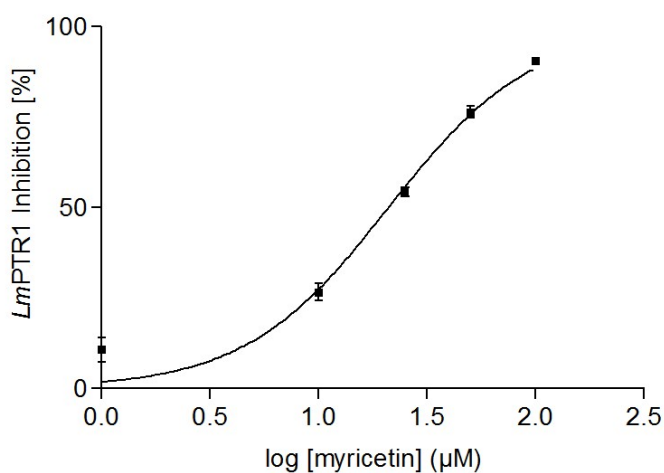

87

88 **Figure S13.** IC<sub>50</sub> determination of myricetin (4). The absolute IC<sub>50</sub> value was determined by nonlinear  
 89 regression analysis employing GraphPad Prism 3.00, and is given in Table 1.

90

91

92

93

94

| Best-fit values          |                |
|--------------------------|----------------|
| BOTTOM (Constant)        | 0.0            |
| TOP (Constant)           | 100.0          |
| LOGEC50                  | 1.626          |
| HILLSLOPE                | 1.832          |
| EC50                     | 42.23          |
| Std. Error               |                |
| LOGEC50                  | 0.02046        |
| HILLSLOPE                | 0.1519         |
| 95% Confidence Intervals |                |
| LOGEC50                  | 1.583 to 1.668 |
| HILLSLOPE                | 1.514 to 2.150 |
| EC50                     | 38.26 to 46.60 |
| Goodness of Fit          |                |
| Degrees of Freedom       | 19             |
| R <sup>2</sup>           | 0.9736         |
| Absolute Sum of Squares  | 644.4          |
| Sy.x                     | 5.824          |

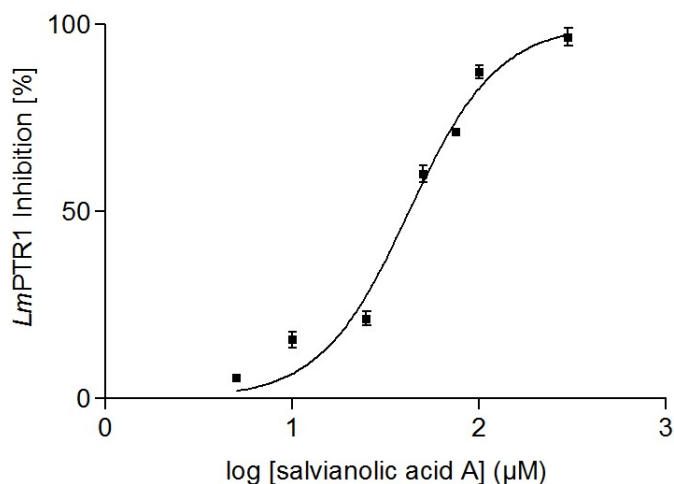

95

96 **Figure S14.** IC<sub>50</sub> determination of salviainolic acid A (5). The absolute IC<sub>50</sub> value was determined by  
 97 nonlinear regression analysis employing GraphPad Prism 3.00, and is given in Table 1.

| Best-fit values          |                |
|--------------------------|----------------|
| BOTTOM (Constant)        | 0.0            |
| TOP (Constant)           | 100.0          |
| LOGEC50                  | 1.284          |
| HILLSLOPE                | 2.201          |
| EC50                     | 19.24          |
| Std. Error               |                |
| LOGEC50                  | 0.02377        |
| HILLSLOPE                | 0.1983         |
| 95% Confidence Intervals |                |
| LOGEC50                  | 1.234 to 1.335 |
| HILLSLOPE                | 1.781 to 2.621 |
| EC50                     | 17.14 to 21.61 |
| Goodness of Fit          |                |
| Degrees of Freedom       | 16             |
| R <sup>2</sup>           | 0.9675         |
| Absolute Sum of Squares  | 688.7          |
| Sy.x                     | 6.561          |

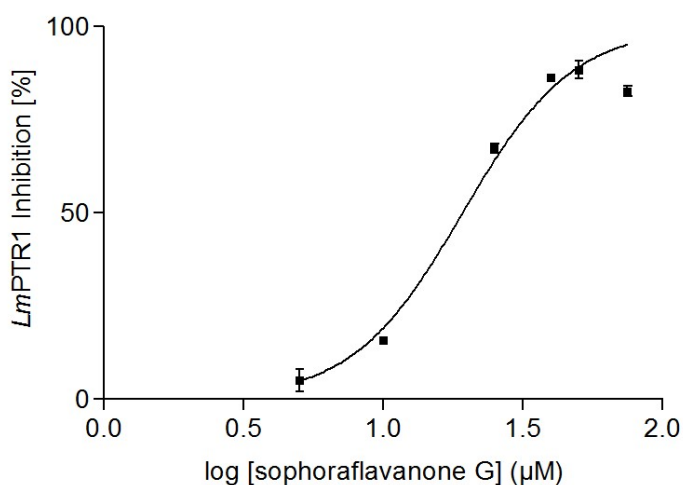

98

99 **Figure S15.** IC<sub>50</sub> determination of sophoraflavanone G (5). The absolute IC<sub>50</sub> value was determined by  
 100 nonlinear regression analysis employing GraphPad Prism 3.00, and is given in Table 1.
